# Supplementary material
Source: PubMed Central journal article supplement (PMC4321148)
Supplement: rsbl20140815supp1.pdf [file rsbl20140815supp1.pdf]

*Eramoscorpius brucensis* gen. et sp. nov. Measurements taken using a hand held digital micrometer. All measurements in mm.

|                      |                                 | Average       | 59322                                                                                                        | 58777<br>Left                      | 58777<br>Right | 60063<br>Left                  | 60063<br>Right | 58931<br>Left                         | 58931<br>Right | 50048<br>Left                            | 50048<br>Right | 53247<br>Left       | 53247<br>Right      | 49275<br>Left                            | 49275<br>Right | 56751<br>Left                   | 56751<br>Right | 61159<br>Left          | 61159<br>Right | 53248<br>Left                | 53248<br>Right | 58778<br>Left             | 58778<br>Right |
|----------------------|---------------------------------|---------------|--------------------------------------------------------------------------------------------------------------|------------------------------------|----------------|--------------------------------|----------------|---------------------------------------|----------------|------------------------------------------|----------------|---------------------|---------------------|------------------------------------------|----------------|---------------------------------|----------------|------------------------|----------------|------------------------------|----------------|---------------------------|----------------|
|                      |                                 |               | Partial abdomen. Probable early instar                                                                       | Dorsal                             |                | Ventral partial internal mould |                | Dorsal?                               |                | Ventral Truncated                        |                | Ventral truncated   |                     | Dorsal, truncated                        |                |                                 |                |                        |                | Dorsal                       |                | Ventral                   |                |
| Discovery            |                                 |               | Excavated                                                                                                    | Freshly split rock in quarry       |                | Patio flagstone                |                | Freshly split rock in quarry          |                | Building stone, freshly split            |                | Quarry spoil heap   |                     | Building stone, freshly split            |                | Freshly split rock in quarry    |                |                        |                | Freshly split rock in quarry |                | Patio flagstone           |                |
| Locality             |                                 |               | Owen Sound Ledgerrock quarry, Wiarton, within Biota 3 of the Lower Interbedded Unit (von Bitter et al. 2007) | Limberlost Quarry, Bruce Peninsula |                | Unknown (Bruce Peninsula)      |                | Bruce Peninsula Stone Quarry, Wiarton |                | Unknown (probably Amsen Quarry, Wiarton) |                | Spoil heap, Wiarton |                     | Unknown (probably Amsen Quarry, Wiarton) |                | Lindsay Quarry, near Tobermorey |                | Wiarton Ledgerrock (?) |                | Amsen Quarry, Mar            |                | Unknown (Bruce Peninsula) |                |
| <b>Total length:</b> |                                 | <b>123.20</b> | <b>[26.5]</b>                                                                                                | 63.00                              |                |                                |                | 115.00                                |                | X                                        |                | X                   |                     | X                                        |                | 130.00                          |                | X                      |                | 143.00                       |                | 165.00                    |                |
| Carapace/Prosoma:    | Length                          | X             |                                                                                                              | 8.92                               | 7.58           | 15.57                          |                | 14.05                                 | 14.05          | 15.00                                    | 15.00          | 23.07               | 23.07               | 18.90                                    | 19.10          | 19.80                           | 19.80          | 21.05                  | 21.05          | 21.34                        | 21.34          | 26.14                     | 26.14          |
| Carapace:            | Maximum width                   | X             |                                                                                                              | 8.83                               |                |                                |                | 11.64                                 |                | 14.20                                    |                | 20.00               | (really can't tell) | 18.30                                    | 17.60          | 19.60                           |                | 14                     |                | 18.10                        |                | 22.99                     |                |
|                      | <b>Carapace L:W Ratio</b>       | <b>1.14</b>   |                                                                                                              | <b>1.01</b>                        |                |                                |                | <b>1.21</b>                           |                | <b>1.06</b>                              |                | <b>1.15</b>         |                     | <b>1.03</b>                              | <b>1.09</b>    | <b>1.01</b>                     |                | <b>1.50</b>            |                | <b>1.18</b>                  |                | <b>1.14</b>               |                |
|                      | <b>Carapace L:Total L</b>       | <b>0.14</b>   |                                                                                                              | <b>0.14</b>                        |                |                                |                | <b>0.12</b>                           |                |                                          |                |                     |                     |                                          |                | <b>0.15</b>                     |                |                        |                | <b>0.15</b>                  |                | <b>0.16</b>               |                |
| Chelicera            | Maximum height                  | X             |                                                                                                              | 2.04                               |                |                                |                | 2.62                                  | X              | 7.40                                     |                |                     |                     | 3.36                                     | 3.36           | X                               |                |                        |                |                              |                |                           |                |
| Chela:               | Length                          | X             |                                                                                                              | 2.19                               |                |                                |                | 5.41                                  | X              | 2.30                                     |                |                     |                     | 8.30                                     | 8.30           |                                 |                |                        |                |                              |                |                           |                |
| Chela:               | Length of movable finger        | X             |                                                                                                              | 1.5?                               |                |                                |                | 3.08                                  | X              |                                          |                |                     |                     | 3.5?                                     | ?              |                                 |                |                        |                |                              |                |                           |                |
| Pedipalp             | Coxa length                     | X             |                                                                                                              |                                    |                |                                |                |                                       | X              | 5.70                                     | 5.70           | 9.22                |                     | X                                        |                |                                 |                |                        |                |                              |                |                           |                |
|                      | Coxa width                      | X             |                                                                                                              |                                    |                |                                |                |                                       | X              | 5.50                                     | 6.10           | 8.55                |                     | X                                        |                |                                 |                |                        |                |                              |                |                           |                |
|                      | Trochanter length               | X             |                                                                                                              | 3.80                               | 3.60           |                                |                |                                       |                | 11.50                                    | 11.60          | 9.06                | 7.80                | 8.06                                     | 6.30           | 7.90                            | 7.44           | 6.04                   |                |                              | 6.74           | 7.07                      |                |
|                      | Trochanter width                | X             |                                                                                                              |                                    |                |                                |                |                                       |                | 4.8+                                     | 4.80           | 7.40                | 7.30                | 4.50                                     | 6.03           | 7.30                            |                |                        |                |                              | 7.35           | 7.08                      |                |
|                      | Femur length                    | X             |                                                                                                              | 6.21                               | 5.60           |                                |                |                                       |                | 11.20                                    | 6.97           | 14.41               | 13.80               | 13.00                                    | 12.30          | 6.16                            | 12.63          | 9.63                   |                |                              | 13.56          | 13.92                     |                |
|                      | Femur width                     | X             |                                                                                                              | 2.40                               | 3.00           |                                |                |                                       |                | 3.90                                     |                | 6.50                | 6+                  | 4.20                                     | 4.30           | 6.78                            |                |                        |                |                              |                |                           |                |
|                      | Patella length                  | X             |                                                                                                              | 4.33                               | 4.80           |                                |                |                                       |                | 7.90                                     |                | 9.13                | 9.23                | 7+                                       | 9.00           | 13.44                           | 6.70           | 8.92                   |                |                              | 9.95           | 9.84                      |                |
|                      | Patella width                   | X             |                                                                                                              | 3.40                               | 3.60           |                                |                |                                       |                | 5.80                                     |                | 6.60                | 6.00                | 6.65                                     | 5.47           | 6.80                            |                | 6.32                   |                |                              |                |                           |                |
| <b>Pedipalp</b>      | <b>Pedipalp L femur:patella</b> | <b>1.41</b>   |                                                                                                              | <b>1.43</b>                        | <b>1.17</b>    |                                |                |                                       |                | <b>1.42</b>                              |                | <b>1.58</b>         |                     |                                          | <b>1.37</b>    |                                 | <b>1.89</b>    | <b>1.08</b>            |                |                              | <b>1.36</b>    | <b>1.41</b>               |                |
|                      | Tibia length                    | X             |                                                                                                              | 16.31                              | 15.86          |                                |                | 23.09                                 | 21.19          | 28.13                                    |                | 35.18               | 35.80               | 30.30                                    | 29.60          | 27.80                           | 29.60          | >23                    |                |                              | 29.54          | 29.47                     |                |
|                      | Manus length                    | X             |                                                                                                              |                                    |                |                                |                | 8.77                                  | 6.99           | 11.77                                    |                | 14.00               | 14.60               | 12.80                                    | 12.15          | 13.90                           | 12.80          | 13                     |                |                              | 12.57          | 13.01                     |                |
|                      | Tibia max width                 | X             |                                                                                                              | 4.79                               | 4.26           |                                |                | 5.17                                  | 4.86           | 10.39                                    |                | 9.23                |                     | 7.70                                     |                | 9.50                            | 9.42           | 9.82                   |                |                              | 8.60           | 8.34                      |                |

*Eramoscorpius brucensis* gen. et sp. nov. Measurements taken using a hand held digital micrometer. All measurements in mm.

|            |                              | Average | 59322 | 58777<br>Left | 58777<br>Right | 60063<br>Left | 60063<br>Right | 58931<br>Left | 58931<br>Right | 50048<br>Left | 50048<br>Right | 53247<br>Left | 53247<br>Right | 49275<br>Left | 49275<br>Right | 56751<br>Left | 56751<br>Right | 61159<br>Left | 61159<br>Right | 53248<br>Left | 53248<br>Right | 58778<br>Left | 58778<br>Right |
|------------|------------------------------|---------|-------|---------------|----------------|---------------|----------------|---------------|----------------|---------------|----------------|---------------|----------------|---------------|----------------|---------------|----------------|---------------|----------------|---------------|----------------|---------------|----------------|
| Pedipalp   | Tibia max width:total length | 0.29    |       | 0.29          | 0.27           |               |                | 0.22          | 0.23           | 0.37          |                | 0.26          |                | 0.25          |                | 0.34          | 0.32           |               |                | 0.29          | 0.28           |               |                |
| Pedipalp   | Free finger                  | X       |       | 10.35         | 9.47           |               |                | 16.03         | 15.40          | 16.24         | 18.07          | 22.60         | 24.80          | 19.25         | 17.00          | 21.36         | 20.65          | >9            |                | 21.82         | 19.96          |               |                |
| Pedipalp   | free finger:tibia            | 0.67    |       | 0.63          | 0.60           |               |                | 0.69          | 0.73           | 0.58          |                | 0.64          | 0.69           | 0.64          | 0.57           | 0.77          | 0.70           |               |                | 0.74          | 0.68           |               |                |
| Pedipalp   | Free finger:manus            | 1.64    |       |               |                |               |                | 1.83          | 2.20           | 1.38          |                | 1.61          | 1.70           | 1.50          | 1.40           | 1.54          | 1.61           |               |                | 1.74          | 1.53           |               |                |
| Pedipalp:  | Total length (inc troch)     | X       |       | 34.98         | 34.66          |               |                | X             | X              | 66.63         |                | 76.91         | 75.86          | 51.36         | 66.20          | 68.74         | 63.07          | 33.51         |                | 69.74         | 70.14          |               |                |
| Pedipalp:  | Tibia L:total pedipalp L     | 0.46    |       | 0.47          | 0.46           |               |                |               |                | 0.42          |                | 0.46          | 0.47           | 0.59          | 0.45           | 0.40          | 0.47           |               |                | 0.42          | 0.42           |               |                |
| Pedipalp:  | Tibia:carapace               | 1.60    |       | 1.83          | 2.09           |               |                | 1.64          | 1.51           | 1.88          |                | 1.52          | 1.55           | 1.60          | 1.55           | 1.40          | 1.49           |               |                | 1.38          | 1.38           |               |                |
| Sternum    | length                       |         |       |               |                | 11.06         |                |               |                | 10.94         |                | 14.80         |                |               |                |               |                | 14.59         |                |               |                |               |                |
| Sternum    | max width                    |         |       |               |                | 4.87          |                |               |                | 4.70          |                | 7.18          |                |               |                |               |                | 5.83          |                |               |                |               |                |
| Sternum    | L:W                          | 2.29    |       |               |                | 2.27          |                |               |                | 2.33          |                | 2.06          |                |               |                |               |                | 2.50          |                |               |                |               |                |
| Sternum:ca | rapace L                     | 0.69    |       |               |                | 0.71          |                |               |                | 0.73          |                | 0.64          |                |               |                |               |                | 0.69          |                |               |                |               |                |
| Leg I:     | Total length                 | X       |       | 10.30         |                |               |                | X             | X              | X             | X              | 30+           | 33+            |               |                | 0.71          |                |               |                | X             | 28.20          |               |                |
|            | Coxa length                  |         |       |               |                | 4.89          |                |               |                |               |                |               |                |               |                |               |                |               |                |               |                |               |                |
|            | Coxa width                   |         |       |               |                | 4.40          |                |               |                |               |                |               |                |               |                |               |                |               |                |               |                |               |                |
|            | Trochanter                   |         |       |               |                |               |                |               |                |               |                |               |                |               |                |               |                |               |                |               |                |               |                |
|            | Femur                        |         | x     | x             |                |               |                |               |                | x             | x              | x             | x              | X             | X              | x             | x              | 5.75          |                | x             | x              | X             | 5.80           |
|            | patella                      |         | x     | x             |                |               |                |               |                | x             | x              | x             | x              | X             | x              | x             | x              | 3.55          |                | x             | x              | X             | 4.60           |
|            | tibia                        |         | x     | x             |                |               |                |               |                | x             | x              | x             | x              | X             | x              | x             | x              | 4.4           |                | x             | x              | x             | 5.20           |
| Leg I:     | Tibia:patella                | 0.85    |       |               |                |               |                |               |                |               |                |               |                |               |                |               |                | 0.81          |                |               |                |               | 0.88           |
|            | basitarsus                   |         | x     | x             |                |               |                |               |                | x             | 4.30           | 4.40          | x              | X             | x              | x             | x              | 4.19          |                | x             | x              | x             | 3.70           |
|            | tarsus                       |         | x     | x             |                |               |                |               |                | x             | 3.60           | 3.30          | x              | X             | x              | x             | x              | 3.89          |                | x             | x              | x             | 3.40           |
| Leg I:     | Basiarsus:tarsus             | 1.20    |       |               |                |               |                |               |                |               | 1.19           | 1.33          |                |               |                |               |                | 1.08          |                |               |                |               |                |
|            | posttarsus                   |         | x     | x             |                |               |                |               |                | x             |                | X             | 2 claws?       | 2 claws?      | X              | x             | x              |               |                | x             | x              | x             | claw           |
| Leg II:    | Total length                 | X       |       | 15.60         | 17.00          |               |                | X             | X              | 31.20         | X              | 37+           | 32+            |               |                | 39+           |                |               |                | 30.4+         | 34.4+          |               |                |
|            | Coxa length                  |         |       |               |                | 5.29          |                |               |                |               |                |               |                |               |                |               |                | 6.05          |                |               |                |               |                |
|            | Coxa width                   |         |       |               |                | 3.75          |                |               |                |               |                |               |                |               |                |               |                | 5.86          |                |               |                |               |                |
|            | trochanter                   |         | x     | x             |                |               |                |               |                |               |                |               |                |               |                |               |                | 6.57          |                | x             | x              | x             | x              |
|            | femur                        |         |       | 3.20          | 9.00           |               |                |               |                | 2.50          | 4.00           | x             | x              |               |                | x             | x              | 6.57          |                | x             | x              | x             | 9.00           |
|            | patella                      |         |       | 2.70          | 6.30           |               |                |               |                | 6.30          | 6.9            | x             | x              |               | 7.90           | 8.90          | x              | 6.67          |                | x             | x              | 9.00          | 8.50           |
|            | tibia                        |         | x     | x             |                |               |                |               |                | 5.00          | 4.50           | x             | x              |               | 5.70           | 5.30          | x              | 6.20          |                | 7.26          | 6.44           | 5.10          | 5.40           |
|            |                              |         |       |               |                |               |                |               |                | 5.80          | 5.70           | x             | x              |               | 5.20           | 6.30          | x              | 7.52          |                | 6.96          | 7.52           | 6.90          | 5.40           |
| Leg II:    | Tibia:patella                | 0.89    |       |               |                |               |                |               |                | 0.86          | 0.79           |               |                |               | 1.10           | 0.84          |                | 1.04          | 0.86           | 0.74          |                |               | 0.93           |
|            | basitarsus                   |         | x     | x             |                |               |                |               |                | 3.30          | 3.30           | x             | x              |               | 4.50           | 3.60          | x              |               |                | x             | x              | x             | 4.10           |
|            | tarsus                       |         | x     | x             |                |               |                |               |                | 2.90          | 3.10           | x             | 2 claws        |               | 3.50           | 2.90          | x              |               |                | x             | x              | x             | 3.60           |
| Leg II:    | Basiarsus:tarsus             | 1.17    |       |               |                |               |                |               |                | 1.14          | 1.06           |               |                |               | 1.29           | 1.24          |                |               |                |               |                |               | 1.14           |
|            | posttarsus                   |         | x     | x             |                |               |                |               |                |               | (claw)         | 2 claws       | x              | claw          | claw           | x             | x              |               |                | x             | x              | x             | x              |
| Leg III:   | Total length                 | X       |       | 20.30         | 20.10          |               |                | X             | X              | 38.67         | x              | 47.00         | 48.00          |               |                | 41+           | 40.50          |               |                | 43.5+         | 43+            |               |                |
|            | Coxa length                  |         |       |               |                | 5.20          | 5.80           |               |                |               |                |               |                |               |                |               |                | 8.01          |                |               |                |               |                |
|            | Coxa width                   |         |       |               |                | 3.50          | 4.20           |               |                |               |                |               |                |               |                |               |                |               |                |               |                |               |                |
|            | trochanter                   |         | x     | x             |                |               |                |               |                | 6.90          | x              | x             | x              | x             | x              | x             | x              |               |                | x             | x              | x             |                |
|            | femur                        |         | x     | x             |                |               |                |               |                | 8.30          | x              | x             | x              |               | 13.20          | x             | 7.9?           |               |                | 8.79          | 10.30          | x             | 9.70           |
|            | patella                      |         |       | 3.30          | 3.30           |               |                |               |                | 6.60          | x              | x             | x              |               | 6.60           | 6.90          | 5.90           | 6.20          | 6.02           | 7.30          | 7.20           | x             | 9.00           |

*Eramoscorpius brucensis* gen. et sp. nov. Measurements taken using a hand held digital micrometer. All measurements in mm.

|                              |                          | Average     | 59322 | 58777<br>Left | 58777<br>Right | 60063<br>Left | 60063<br>Right | 58931<br>Left | 58931<br>Right | 50048<br>Left    | 50048<br>Right | 53247<br>Left | 53247<br>Right | 49275<br>Left | 49275<br>Right | 56751<br>Left | 56751<br>Right | 61159<br>Left | 61159<br>Right | 53248<br>Left | 53248<br>Right | 58778<br>Left | 58778<br>Right    |      |
|------------------------------|--------------------------|-------------|-------|---------------|----------------|---------------|----------------|---------------|----------------|------------------|----------------|---------------|----------------|---------------|----------------|---------------|----------------|---------------|----------------|---------------|----------------|---------------|-------------------|------|
|                              | tibia                    |             |       | 3.80          | 3.20           |               |                |               |                | 7.80             | x              | x             | x              | 7.50          | x              | 7.20          | 7.60           |               | 9.16           | 8.20          | 8.20           | 10.20         | 9.50              |      |
| Leg III:                     | <b>Tibia:patella</b>     | <b>0.86</b> |       | <b>0.87</b>   | <b>1.03</b>    |               |                |               |                | <b>0.85</b>      |                |               |                | <b>0.88</b>   |                | <b>0.82</b>   | <b>0.82</b>    |               | <b>0.66</b>    | <b>0.89</b>   | <b>0.88</b>    |               | <b>0.95</b>       |      |
|                              | basitarsus               |             |       | 2.00          | x              |               |                |               |                | 3.50             | x              | x             | x              | 4.80          | x              | 4.20          | 4.70           |               | 6.5            | x             |                | 5.10          | x                 | 4.30 |
|                              | tarsus                   |             |       | 1.70          | x              |               |                |               |                | 2.90             | x              | x             | x              | 4.30          | x              | 3?            |                |               |                | x             |                | 4.60          | x                 | x    |
| Leg III:                     | <b>Basitarsus:tarsus</b> | <b>1.18</b> |       | <b>1.18</b>   |                |               |                |               |                | <b>1.21</b>      |                |               |                | <b>1.12</b>   |                |               | <b>1.27</b>    |               |                |               | <b>1.11</b>    |               |                   |      |
|                              | posttarsus               |             |       | claws         | x              |               |                |               |                | 2 claws          | x              | x             | 2 claws        | 2 claws       | x              | x             | 2 claws        |               |                | x             | x              | x             | x                 |      |
| Leg IV:                      | Total length             | X           |       | 23.40         | 22.00          | 38.10         |                | X             | X              | 44.60            | 43.50          | 52.00         | 57.00          |               |                | 56.00         |                |               |                | 64.58         | 50.84          |               |                   |      |
|                              | Coxa length              |             |       |               |                | 6.90          |                |               |                |                  |                |               |                |               |                |               |                |               |                |               |                |               |                   |      |
|                              | Coxa width               |             |       |               |                | 4.20          |                |               |                |                  |                |               |                |               |                |               |                |               |                |               |                |               |                   |      |
|                              | trochanter               |             |       | x             | x              | 4.80          |                |               |                | 6.60             | 5.90           | x             | x              |               |                | x             | x              |               |                | x             | x              | x             | x                 |      |
|                              | femur                    |             |       | 5.70          | 5.70           | 8.60          |                |               |                | 10.40            | 10.5<br>9.1    | x             | x              | 16.80         | 16.50          | 12?           | 10.60          |               | 6.37           | x             | 12?            | x             |                   |      |
|                              | patella                  |             |       | 4.00          | 3.60           | 6.90          |                |               |                | 8.50             | 7.50           | 8.80          | 10.6?          | 8.00          | 8.00           | 7.30          | 7.90           |               | 6.45           | 8.90          | 7.30           | x             |                   |      |
|                              | tibia                    |             |       | 5.00          | 4.40           | 5.76          |                |               |                | 9.50             | 9.50           | 11.40         | x              | 9.50          | 2.88           | 8.90          | 9.00           |               |                | 11.00         | 8.90           | x             |                   |      |
| Leg IV:                      | <b>Tibia:patella</b>     | <b>1.02</b> |       | <b>0.80</b>   | <b>0.82</b>    | <b>1.20</b>   |                |               |                | <b>0.89</b>      | <b>0.79</b>    | <b>0.77</b>   |                | <b>0.84</b>   | <b>2.78</b>    | <b>0.82</b>   | <b>0.88</b>    |               |                | <b>0.81</b>   | <b>0.82</b>    |               |                   |      |
|                              | basitarsus               |             |       | 2.90          | 2.40           | 3.60          |                |               |                | 4.60             | 4.70           | 6.00          | x              | 5.00          | 5.50           | 5.50          | 4.30           |               |                | x             |                | 5.50          | x                 |      |
|                              | tarsus                   |             |       | 2.20          | 1.60           | 3.60          |                |               |                | 3.70             | 3.90           | 4.90          | x              | 4.40          | 4.30           | 4.20          | 4.10           |               |                | x             |                | 4.20          | x                 |      |
| Leg IV:                      | <b>Basitarsus:tarsus</b> | <b>1.23</b> |       | <b>1.32</b>   | <b>1.50</b>    | <b>1.00</b>   |                |               |                | <b>1.24</b>      | <b>1.21</b>    | <b>1.22</b>   |                | <b>1.14</b>   | <b>1.28</b>    | <b>1.31</b>   | <b>1.05</b>    |               |                |               |                | <b>1.31</b>   |                   |      |
|                              | posttarsus               |             |       | claws         | x              | claws         |                |               |                | claw             | 2 claws        | 2 claws?      | x              | CLAW          | claw           | claw          | claw           |               |                | x             | claws          | x             |                   |      |
| Mesosoma:                    | Total length (tergites)  | X           |       | 18.50         | 18.50          | 38.00         |                | 44.13         |                | 44.20            | 44.20          | 44.20         |                | 61.39         |                | 46.00         |                |               | 48.83          | 48.83         | 47.00          |               | 48.94             |      |
|                              | <b>Leg IV:Mesosoma</b>   | <b>1.12</b> |       | <b>1.26</b>   | <b>1.19</b>    | <b>1.00</b>   |                |               |                | <b>1.01</b>      | <b>0.98</b>    | <b>1.18</b>   |                |               |                | <b>1.22</b>   |                |               |                |               |                |               |                   |      |
| Mesosoma:                    | Tergite I length         | X           |       |               |                |               |                | 5.19          |                | 5.85 (ab plates) |                | 7.50          |                |               |                |               |                |               | 8.28           | 5.68          | 6.00           |               | 6.92              |      |
| Mesosoma:                    | Tergite II length        | X           |       |               |                | 6.00          |                | 6.78          |                | 7.00             |                | 7.60          |                |               |                |               |                |               | 7.46           | 5.72          | 5.50           |               |                   |      |
| Mesosoma:                    | Tergite III length       |             | 2.25  |               |                | 6.00          |                | 6.02          |                | 7.00             |                | 7.95          |                |               |                | 5?            |                |               | 7.02           | 6.86          | 5.90           |               | 7.14              |      |
| Mesosoma:                    | Tergite IV length        |             | 2.25  |               |                | 6.00          |                | 6.05          |                | 7.00             |                | 8.60          |                |               |                | 5?            |                |               | 7.84           | 7.16          | 6.05           |               | 8.35              |      |
| Mesosoma:                    | Tergite V length         |             | 2.25  |               |                | 6.00          |                | 6.81          |                | 7.00             |                | 8.08          |                |               |                | 5.90          |                |               | 8.24           | 7.97          | 5.24           |               | 9.30              |      |
| Mesosoma:                    | Tergite VI length        |             | 2.25  |               |                | 6.06          |                | 7.46          |                | 7.20             |                | 8.29          |                |               |                | 7.90          |                |               | 7.5            | 6.38          |                |               | 9.10              |      |
| Mesosoma:                    | Tergite VII length       |             | 2.40  | 5.42          |                | 8.52          |                | 9.84          |                | 9.87             |                | 9.47          |                | 10.70         |                | 10.00         |                |               | 12.05          | 12.70         |                |               | 13.57             |      |
| Mesosoma:                    | Tergite maximum width    |             | 6.03  | 9.90          |                | 18.00         |                | 16.50         |                | 19.53            |                | 25.23         |                | 25.00         |                | 24.00         |                |               | 23.68          | 22.04         |                |               | 26.78             |      |
| Mesosoma:                    | <b>Length:Max width</b>  | <b>2.11</b> |       | <b>1.87</b>   |                | <b>2.11</b>   |                | <b>2.67</b>   |                | <b>2.26</b>      |                | <b>1.75</b>   |                | <b>2.46</b>   |                | <b>1.92</b>   |                |               | <b>2.06</b>    | <b>2.13</b>   |                |               | <b>1.83</b>       |      |
| <b>Prosoma plus mesosoma</b> |                          |             |       | <b>27.33</b>  |                | <b>50.00</b>  |                | <b>55.77</b>  |                | <b>58.40</b>     |                | <b>64.20</b>  |                | <b>79.69</b>  |                | <b>65.60</b>  |                |               | <b>62.83</b>   | <b>65.10</b>  |                |               | <b>71.93</b>      |      |
| Metasoma I:                  | Maximum width            |             | 2.12  | 4.80          |                |               |                | 8.00          | 8.00           | 11.25            |                |               |                | 10.10         |                | 10.48         |                |               |                |               | 11.60          |               | 12.83             |      |
| Metasoma I:                  | Length                   |             | 2.50  | 6.50          |                |               |                | 10+           | 10.00          | X                |                |               |                | 10.50         |                | 11.70         |                |               |                |               | 14.18          |               | 13.75 ?telescoped |      |
| Metasoma II:                 | Maximum width            |             |       |               |                |               |                |               |                | X                |                |               |                | X             |                | 10.48 (all)   |                |               |                |               | 11.68 (all)    |               |                   |      |
| Metasoma II:                 | Length                   |             | 2.50  | 6.50          |                |               |                | 10+           |                | X                |                |               |                | X             |                | 11.40         |                |               |                |               | 14.02          |               | 15.90             |      |

***Eramoscorpius brucensis* gen. et sp. nov. Measurements taken using a hand held digital micrometer. All measurements in mm.**

|                                       |                               | Average     | 59322       | 58777<br>Left | 58777<br>Right | 60063<br>Left | 60063<br>Right | 58931<br>Left | 58931<br>Right | 50048<br>Left | 50048<br>Right | 53247<br>Left | 53247<br>Right | 49275<br>Left | 49275<br>Right | 56751<br>Left | 56751<br>Right | 61159<br>Left | 61159<br>Right | 53248<br>Left | 53248<br>Right | 58778<br>Left  | 58778<br>Right |
|---------------------------------------|-------------------------------|-------------|-------------|---------------|----------------|---------------|----------------|---------------|----------------|---------------|----------------|---------------|----------------|---------------|----------------|---------------|----------------|---------------|----------------|---------------|----------------|----------------|----------------|
| Metasoma III:                         | Maximum width                 |             |             |               |                |               |                |               |                | X             |                |               |                | X             |                |               |                |               |                |               |                |                |                |
| Metasoma III:                         | Length                        |             | 2.50        | 6.50          |                |               |                | 10+           |                | X             |                |               |                | X             |                | 13.00         |                |               |                | 14.23         |                | 15.86          |                |
| Metasoma IV:                          | Maximum width                 |             |             |               |                |               |                |               |                | X             |                |               |                | X             |                |               |                |               |                |               |                |                |                |
| Metasoma IV:                          | Length                        |             | 2.50        | 6.50          |                |               |                | 10+           |                | X             |                |               |                | X             |                | 13.00         |                |               |                | 13.90         |                | 15.83          |                |
| Metasoma V:                           | Maximum width                 |             |             |               |                |               |                |               |                | X             |                |               |                | X             |                |               |                |               |                |               |                |                | 12.83          |
| Metasoma V:                           | Length                        |             | 2.5?        | 6.70          |                |               |                | 10.00         |                | X             |                |               |                | X             |                | 13.00         |                |               |                | 14.18         |                | 16.08          |                |
| <b>Metasoma</b>                       | <b>Tergite L:W</b>            | <b>1.21</b> | <b>1.18</b> | <b>1.35</b>   |                |               |                | <b>1.25</b>   | <b>1.25</b>    |               |                |               |                |               |                | <b>1.12</b>   |                |               |                | <b>1.22</b>   |                | <b>1.07</b>    |                |
| <b>Metasoma:</b>                      | <b>total length</b>           | <b>1.43</b> |             | <b>1.62</b>   |                |               |                | <b>1.16</b>   |                |               |                |               |                |               |                | <b>1.35</b>   |                |               |                |               |                | <b>1.57</b>    |                |
| Telson:                               | Maximum height                |             | X           | 3.43          |                |               |                | X             |                | X             |                |               |                | X             |                | 6.90          |                |               |                |               |                | 8.53           |                |
| Telson:                               | Total length                  |             | X           | 6.24          |                |               |                | X             |                | X             |                |               |                | X             |                | 14.20         |                |               |                | 8.11 (12.35)  |                | 11.38 (14.76?) |                |
| Metasoma:                             | Total length                  |             | 12.19       | 30.00         |                |               |                | 51.00         |                |               |                |               |                |               |                | 62.30         |                |               |                | 69.16         |                | 77.04          | 77.04          |
| Total length:                         | Prosoma + mesosoma + metasoma |             | X           |               |                |               |                |               |                |               |                |               |                |               |                | 127.80        |                |               |                |               |                |                | 165.00         |
| <b>Mesosoma width: metasoma width</b> |                               | <b>2.21</b> | <b>2.84</b> | <b>2.06</b>   |                |               |                | <b>2.06</b>   |                |               |                |               |                |               |                | <b>2.29</b>   |                |               |                | <b>1.90</b>   |                | <b>2.09</b>    |                |
| <b>metasoma/total length</b>          |                               | <b>0.47</b> |             | <b>0.48</b>   |                |               |                | <b>0.44</b>   |                |               |                |               |                |               |                | <b>0.48</b>   |                |               |                | <b>0.48</b>   |                | <b>0.47</b>    |                |
